# Supplementary material
Source: Springer Nature journal article supplement (https://www.springermedizin.de/resource/supplementary/12935_2010_262_MOESM8_ESM.pdf/9540174)

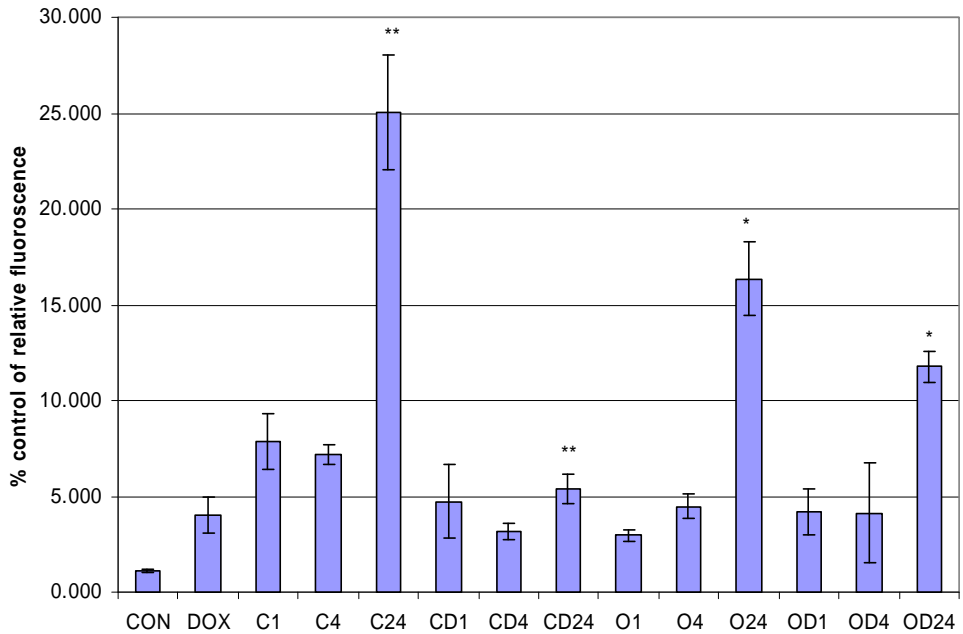

Supplement: MOESM8 [file 9540174]
